# Supplementary material
Source: PubMed Central journal article supplement (PMC10113960)
Supplement: EIJ-D-22-00544_Spilias_SD.pdf [file EIJ-D-22-00544_Spilias_SD.pdf]

## Supplementary data

**Supplementary Table 1. The CORCINCH-HF and ALIVE clinical trials.**

|                               | <b>CORCINCH-HF</b>                                                                                                                                                                                                                                                                                                                                                                                                                                                                                                                                 | <b>ALIVE</b>                                                                                                                                                                                                                                                                                                                                                                                                                                                                |
|-------------------------------|----------------------------------------------------------------------------------------------------------------------------------------------------------------------------------------------------------------------------------------------------------------------------------------------------------------------------------------------------------------------------------------------------------------------------------------------------------------------------------------------------------------------------------------------------|-----------------------------------------------------------------------------------------------------------------------------------------------------------------------------------------------------------------------------------------------------------------------------------------------------------------------------------------------------------------------------------------------------------------------------------------------------------------------------|
| <b>Study design</b>           | Multi-center prospective randomized trial                                                                                                                                                                                                                                                                                                                                                                                                                                                                                                          | Multi-center prospective non-randomized trial                                                                                                                                                                                                                                                                                                                                                                                                                               |
| <b>Device</b>                 | AccuCinch® Ventricular Repair System                                                                                                                                                                                                                                                                                                                                                                                                                                                                                                               | Revivent TC System                                                                                                                                                                                                                                                                                                                                                                                                                                                          |
| <b>No of subjects</b>         | 400 (1:1 randomization to device vs GDMT)                                                                                                                                                                                                                                                                                                                                                                                                                                                                                                          | 126 (2:1 allocation to device vs GDMT)                                                                                                                                                                                                                                                                                                                                                                                                                                      |
| <b>Key inclusion criteria</b> | <ol style="list-style-type: none"> <li>1. LVEF 20-40% and LVEDD &gt;55mm</li> <li>3. NYHA II-IV (ambulatory)</li> <li>4. Able to complete 6MWT distance 100-450m</li> <li>5. On optimal GDMT and CRT (if indicated) for at least 90 days</li> </ol>                                                                                                                                                                                                                                                                                                | <ol style="list-style-type: none"> <li>1. LVEF &lt;45% and LVESVi &gt;50mL/m<sup>2</sup></li> <li>2. NYHA III-IV (ambulatory) on GDMT</li> <li>3. Contiguous acontractile scar or aneurysm involving the septum, anterior, apical or anterolateral LV wall</li> <li>4. Viable myocardium remote from scar area</li> </ol>                                                                                                                                                   |
| <b>Key Exclusion Criteria</b> | <ol style="list-style-type: none"> <li>1. MI, PCI or CT surgery within 90 days</li> <li>2. Untreated significant CAD</li> <li>3. Severe aortic arch calcification, mobile aortic atheroma, intracardiac mass, thrombus or vegetation</li> <li>4. Suboptimal ventricular anatomy</li> <li>5. MR grade <math>\geq</math>3 or degenerative MR</li> <li>6. Prior mitral or aortic valve replacement</li> <li>7. Planned CT surgery in the next 6 months</li> <li>8. Non-ambulatory NYHA IV</li> <li>9. Severe RV dysfunction by RHC and TTE</li> </ol> | <ol style="list-style-type: none"> <li>1. MI within 90 days</li> <li>2. Intracardiac thrombus or mass</li> <li>3. Secondary MR greater than moderate (EROA&gt;20mm<sup>2</sup>) or degenerative MR</li> <li>4. Need for coronary revascularization</li> <li>5. CRT device within 60 days</li> <li>6. PASP &gt;60mmHg</li> <li>7. Serum Cr &gt;2.5mg/dl, eGFR &lt;30ml/min</li> <li>8. Contraindication to anticoagulation</li> <li>9. CVA or TIA within 6 months</li> </ol> |

|                  |                                                                                                                                                                                                                                                                                                                                                                                                        |                                                                                                                                                                                                                                                                                                                                                                  |
|------------------|--------------------------------------------------------------------------------------------------------------------------------------------------------------------------------------------------------------------------------------------------------------------------------------------------------------------------------------------------------------------------------------------------------|------------------------------------------------------------------------------------------------------------------------------------------------------------------------------------------------------------------------------------------------------------------------------------------------------------------------------------------------------------------|
|                  | <p>10. PASP &gt; 70mmHg</p> <p>11. Severe TR (grade <math>\geq 3</math>)</p> <p>12. Moderate or severe AS or AR</p> <p>13. HOCM, amyloid, restrictive cardiomyopathy, constrictive pericarditis</p> <p>14. eGFR&lt;25 ml/min/1.73m<sup>2</sup></p> <p>15. Stroke within 90 days</p> <p>16. Contraindication to anticoagulation</p> <p>17. Life expectancy &lt; 1 year due to noncardiac conditions</p> | <p>10. Previous open-heart surgery, thoracotomy or pericardiotomy</p> <p>11. Life expectancy &lt;1 year due noncardiac conditions</p>                                                                                                                                                                                                                            |
| <b>Follow-up</b> | 5 years                                                                                                                                                                                                                                                                                                                                                                                                | 5 years                                                                                                                                                                                                                                                                                                                                                          |
| <b>Endpoints</b> | <p>1. Freedom from device related MAEs at 180 and 365 days (all-cause death, MI, stroke, non-elective cardiac surgery, worsening HF requiring mechanical support for <math>\geq 24</math> hours)</p> <p>2. Change in KCCQ Score</p> <p>3. Change in 6MWT distance</p> <p>4. Composite of all-cause death, LVAD implant or heart transplant, HF hospitalizations, change in KCCQ score</p>              | <p>1. All-cause death, mechanical support, emergent cardiac surgery, prolonged mechanical ventilation, renal failure and stroke at 30 days</p> <p>2. All-cause death, mechanical support, operation for HF, bleeding or tamponade at 1-12 months</p> <p>3. HF hospitalizations and improvement in HF symptoms (NYHA class, MLHF quality of life score, 6MWT)</p> |

### Table abbreviations

AR: aortic regurgitation, AS: aortic stenosis, CVA: cerebrovascular accident, eGFR: estimated glomerular filtration rate, HOCM: hypertrophic obstructive cardiomyopathy, KCCQ: Kansas City Cardiomyopathy Questionnaire, MAE: major adverse events, PASP: pulmonary artery systolic pressure, RHC: right heart catheterization, TIA: transient ischemic attack, TR: tricuspid regurgitation.

|                                                                                   | Procedure and Study Design                                                                                                                                                                                                                                                                                                                                                                                                                                              | Baseline Data                                                                                                                                                                                                                     |                                                                                                                                                                                                                     | Follow-up Data                                                                                                                                                                                                                                                                                                                                                                                                       |                                                                                                                                                                                                                                                                                                                                                |
|-----------------------------------------------------------------------------------|-------------------------------------------------------------------------------------------------------------------------------------------------------------------------------------------------------------------------------------------------------------------------------------------------------------------------------------------------------------------------------------------------------------------------------------------------------------------------|-----------------------------------------------------------------------------------------------------------------------------------------------------------------------------------------------------------------------------------|---------------------------------------------------------------------------------------------------------------------------------------------------------------------------------------------------------------------|----------------------------------------------------------------------------------------------------------------------------------------------------------------------------------------------------------------------------------------------------------------------------------------------------------------------------------------------------------------------------------------------------------------------|------------------------------------------------------------------------------------------------------------------------------------------------------------------------------------------------------------------------------------------------------------------------------------------------------------------------------------------------|
| 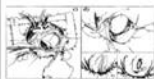 | <b>Dor procedure</b> (endoventricular circular patch)<br>Prospective, observational, single center study of 207 patients with prior anterior MI complicated by aneurysm                                                                                                                                                                                                                                                                                                 | EF (%): 35 ± 13<br>EDVI (ml/m <sup>2</sup> ): 166 ± 77<br>ESVI (ml/m <sup>2</sup> ): 112 ± 64<br>Inducible VT (n): 75/163                                                                                                         |                                                                                                                                                                                                                     | <b>Mean 39 ± 10 months</b><br>EF (%): 48 ± 12<br>EDVI (ml/m <sup>2</sup> ): 86 ± 34<br>ESVI (ml/m <sup>2</sup> ): 46 ± 26<br>Inducible VT (n): 13/182<br>Mortality (%): 14.5 (does not include operative mortality)                                                                                                                                                                                                  |                                                                                                                                                                                                                                                                                                                                                |
|  | <b>Modified Dor procedure</b><br>STICH 2 Trial: multicenter, international, RCT of 1000 patients with LVEF ≤ 35%, CAD amenable to CABG, and anterior LV scar/aneurysm amenable to SVR. Randomized to SVR + CABG vs CABG alone.<br>Primary outcome: death from any cause or hospitalization for cardiac cause                                                                                                                                                            | <b>CABG</b><br>EF (%): 28 (23-31)<br>ESVI (ml/m <sup>2</sup> ): 82 (65-102)<br>MR: 35% trace/none, 47% mild, 14% moderate, 3% severe<br>6MWT (m): 350                                                                             | <b>CABG + SVR</b><br>EF (%): 28 (24-31)<br>ESVI (ml/m <sup>2</sup> ): 82 (66-105)<br>MR: 38% trace/none, 43% mild, 14% moderate, 4% severe<br>6MWT (m): 350                                                         | <b>Median 48 months (control vs treatment)</b><br>Primary outcome: 59% vs 58% p = 0.90, HR 0.99 (0.84-1.17)<br>All cause mortality: 28% vs 28% p = 0.98 HR 1 (0.79-1.26)<br>Average improvement in NYHA class: 1 in both groups (p = 0.7)<br>Average improvement in CCS class: 1.7 in both groups (p = 0.84)<br>6MWT (m): 350 for CABG and 420 for CABG + SVR (p = 0.8)                                              |                                                                                                                                                                                                                                                                                                                                                |
|  | <b>Myoplast</b> (tension filament)<br>21 patients with idiopathic dilated cardiomyopathy, NYHA class III/IV, LVEF ≤ 35%, LVEDd 6.5-12cm underwent Myoplast + mitral valve repair or Myoplast alone                                                                                                                                                                                                                                                                      | <b>Myoplast</b><br>NYHA 2.9 ± 0.4<br>LVEDV (ml): 320 ± 143<br>LVESV (ml): 265 ± 119<br>LVEF (%): 17.1 ± 4<br>MR (grade): 1.6 ± 0.6                                                                                                | <b>Myoplast &amp; MVr</b><br>NYHA 3.0 ± 0.2<br>LVEDV (ml): 339 ± 149<br>LVESV (ml): 263 ± 128<br>LVEF (%): 24.4 ± 9.6<br>MR (grade): 2.8 ± 0.9                                                                      | <b>Myoplast at 6 months</b><br>NYHA 2.1 ± 0.9<br>LVEDV (ml): 296 ± 170<br>LVESV (ml): 233 ± 150<br>LVEF (%): 23.1 ± 7.2<br>MR (grade): 1.6 ± 1.1                                                                                                                                                                                                                                                                     | <b>Myoplast &amp; MVr at 6 months</b><br>NYHA 2.1 ± 0.6<br>LVEDV (ml): 337 ± 150<br>LVESV (ml): 273 ± 141<br>LVEF (%): 21.1 ± 6.4<br>MR (grade): 1.3 ± 1.1                                                                                                                                                                                     |
|  | <b>Coapsys</b> (tension filament)<br>RESTOR-MV: Prospective, multicenter, RCT of 300 patients undergoing CABG with LVEF ≥ 25% and at least moderate MR.<br>Randomized to CABG + MVr (ring annuloplasty or Coapsys) vs CABG (CABG or CABG with Coapsys).<br>Primary outcome: all-cause mortality, primary adverse events, decrease in MR                                                                                                                                 | <b>CABG + MVr (control = 78)</b><br>LVEF: 38.3 ± 10.3<br>MR: 2.54 ± 0.804<br>NYHA: I (7%), II (41%), III (48%)<br><b>CABG + Coapsys (treatment = 74)</b><br>LVEF: 35.4 ± 10<br>MR: 2.4 ± 0.8<br>NYHA: I (5%), II (41%), III (51%) | <b>CABG (control = 8)</b><br>LVEF: 35 ± 8.7<br>MR: 2.0 ± 0.6<br>NYHA: I(0%), II(25%), III(62%)<br><b>CABG + Coapsys (treatment=8)</b><br>LVEF: 39.2 ± 5.8<br>MR: 2.0 ± 0.6<br>NYHA: I (13%), II (62%), III (25%)    | <b>24 months</b><br>Survival (all patients): 77% (control) vs 87% (Coapsys) HR 0.421, p = 0.038<br>Complication-free survival (all patients): 63% (control) & 76% (treatment) HR 0.372, p = 0.022                                                                                                                                                                                                                    | <b>MR Grade (24 months)</b><br>CABG + MVr: 0.35 ± 0.63<br>CABG + Coapsys: 1.24 ± 0.97 (p < 0.0001)<br>CABG: 1.13 ± 0.58<br>CABG + Coapsys: 1.29 ± 0.76<br><b>CABG + MVr improvement NYHA class ≥ 1</b><br>1 year: 66% (control) vs 71% (treatment),<br>2 year: 72% (control) vs 79% (treatment)<br>for time p < 0.001, between groups p = 0.86 |
|  | <b>CorCap</b> (left ventricular polyester mesh)<br>Acorn: Prospective, multicenter, RCT of 300 patients with symptomatic HF (NYHA III-IV), LVEF ≤ 35%, LVEDd ≥ 60mm or LVEDi ≥ 30, and 6MWT < 450m on optimal GDMT. Stratified by need for MVR vs no MVR. Compared Corcap + MVR vs MVR alone and Corcap + GDMT vs GDMT alone.<br>Primary endpoint: composite of survival, the need for major cardiac procedures for worsening heart failure, and a change in NYHA class | <b>Control</b><br>LVEF: 27% ± 8<br>LVEDD 72.5 ± 10.2<br>LVEDV 204 ± 100<br>LVESV 204 ± 100<br>MR: 2.0 ± 1.4<br>MLHF: 60 ± 23.2<br>Peak VO2: 15.5 ± 4.6<br>NYHA: II 15%, III 80%, IV 5%                                            | <b>Treatment</b><br>LVEF (%): 26 ± 9<br>LVEDD (mm): 71.7 ± 10.2<br>LVEDV (ml): 271 ± 108<br>LVESV: 203 ± 96.8<br>MR (grade): 2.0 ± 1.5<br>MLHF: 60.6 ± 21.7<br>Peak VO2: 13.8 ± 3.9<br>NYHA: II 15%, III 82%, IV 3% | <b>Median 27.2 months (control vs treatment)</b><br>Primary endpoint 27% vs 38% HR 1.73 CI 1.07-2.79 p = 0.024<br>Mortality: 16.4% vs 16.8% p = 0.8<br>Freedom from major cardiac procedures: 74% vs 89% p = 0.01<br>Improvement in NYHA ≥ 1 class: 36% vs 45% p = 0.049<br>Serious adverse events 1 year: 78% vs 81% p = 0.43<br>Treatment effect LVEF: 3.8% p 0.45, LVESV: -15.6ml p 0.013, LVEDV: -18.8ml p 0.005 |                                                                                                                                                                                                                                                                                                                                                |
|  | <b>HeartNet</b> (circumferential nitinol epicardial mesh that covers LV and RV)<br>PEERLESS-HF: Multicenter RCT of 200 patients with symptomatic HF, EF ≤ 35% despite GDMT, 6MWD 150-450 m, peak VO2 10-20 ml/kg/min, LVEDD < 85mm, LVEDDi < 40 mm, and HF duration > 6 months.                                                                                                                                                                                         | <b>Control</b><br>NYHA II 51%<br>NYHA III 50%                                                                                                                                                                                     | <b>Treatment</b><br>NYHA II 51%<br>NYHA III 45%                                                                                                                                                                     | <b>6 months (control vs treatment)</b><br>Peak VO2: improvement frequency 39% vs 37% (p=0.5)<br>MLQHF: improvement frequency: 49% vs 37% (p = 0.184)<br>6MWT: improvement frequency: 25% vs 38% (p=0.044)<br>NYHA improvement at 6 months: 29 patients vs 37 patients (p = 0.52)<br>KCCQ mean change at 6 months: 3.4 vs 12.6 (p < 0.001)                                                                            |                                                                                                                                                                                                                                                                                                                                                |

## Supplementary Figure 1. Surgical ventricular restoration procedures and relevant studies<sup>21,22,24-29</sup>.

CABG: coronary artery bypass grafting, CCS: Canadian Cardiovascular Society, FMR: functional mitral regurgitation, HR: hazard ratio, KCCQ: Kansas City Cardiomyopathy Questionnaire, MLHF: Minnesota Living with Heart Failure, MVr: mitral valve repair, RCT: randomized-controlled trial, SVR: surgical ventricular restoration, VO2: oxygen consumption, 6MWT: 6-minute walk test

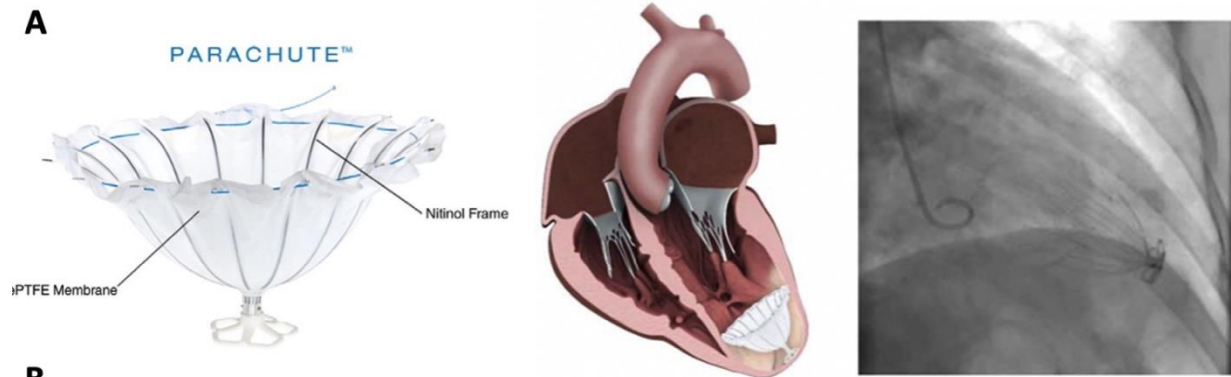

**B**

|                             | Baseline     | 6 mo         | 12 mo        | 24 mo        | 36 mo        |
|-----------------------------|--------------|--------------|--------------|--------------|--------------|
| LVEDVI (ml/m <sup>2</sup> ) | 125.7 (3.04) | 109.4 (3.04) | 108.9 (3.04) | 108.9 (3.04) | 114.4 (3.04) |
| LVESVI (ml/m <sup>2</sup> ) | 89.6 (2.60)  | 77.1 (2.60)  | 76.7 (2.60)  | 76.6 (2.60)  | 87.0 (2.60)  |
| EF %                        | 28.9 (1.39)  | 29.7 (1.39)  | 30.0 (1.39)  | 30.0 (1.39)  | 27.0 (1.39)  |

**Supplementary Figure 2. The Parachute left ventricular partitioning device.**

**A:** The Parachute device consists of a self-expanding nitinol frame, a polytetrafluoroethylene (ePTFE) impermeable membrane and an atraumatic polymer foot and is implanted in the left ventricular apex. **B:** 36-month longitudinal echocardiographic data from patients who received the Parachute device.
